# Supplementary material for: LPS-Dephosphorylating Cobetia amphilecti Alkaline Phosphatase of PhoA Family Divergent from the Multiple Homologues of Cobetia spp
Source: MDPI journal article supplement (doi:10.3390/microorganisms12030631), 2024-03-21
Supplement: s1 [file s1]

**Table S2.** The content and distribution of alkaline phosphatase families in *Cobetia* spp. isolates

| Original Strain title            | Actual species       | Accession ID    | ID protein     | ALP family   | Isolation source                                                                        |
|----------------------------------|----------------------|-----------------|----------------|--------------|-----------------------------------------------------------------------------------------|
| <i>C. amphilecti</i> KMM 296*    | <i>C. amphilecti</i> | GCF_000754225.1 | WP_043332298.1 | PafA         | Coelomic fluid of mollusc <i>C. grayanus</i> (Russia: The Sea of Japan)                 |
|                                  |                      |                 | WP_043333989.1 | PhoD         |                                                                                         |
|                                  |                      |                 | WP_245163010.1 | <b>PhoA*</b> |                                                                                         |
|                                  |                      |                 | WP_043336117.1 | PhoX         |                                                                                         |
|                                  |                      |                 | WP_052384691.1 | PhoD         |                                                                                         |
| <i>Cobetia</i> sp. UCD-24C*      | <i>C. amphilecti</i> | GCF_001306765.1 | WP_082388216.1 | PhoD         | Seagrass <i>Zostera</i> sp. sediment                                                    |
|                                  |                      |                 | WP_054555671.1 | PhoD         |                                                                                         |
|                                  |                      |                 | WP_054555885.1 | PafA         |                                                                                         |
|                                  |                      |                 | WP_235507008.1 | <b>PhoA*</b> |                                                                                         |
|                                  |                      |                 | WP_054557251.1 | PhoX         |                                                                                         |
| <i>C. amphilecti</i> B2M13*      | <i>C. amphilecti</i> | GCF_018860945.1 | WP_244994940.1 | PhoD         | Alginate 40-100 m particle (artificial) (USA: Canoe Beach)                              |
|                                  |                      |                 | WP_234368129.1 | <b>PhoA*</b> |                                                                                         |
|                                  |                      |                 | WP_216060785.1 | PhoX         |                                                                                         |
|                                  |                      |                 | WP_216060931.1 | PafA         |                                                                                         |
|                                  |                      |                 | WP_216061230.1 | PhoD         |                                                                                         |
| <i>Cobetia</i> sp. 1AS1*         | <i>C. amphilecti</i> | GCF_029846435.1 | WP_279838219.1 | PafA         | Coastal seawater (Russia: the Sea of Japan, Vostok Bay)                                 |
|                                  |                      |                 | WP_279838543.1 | <b>PhoA*</b> |                                                                                         |
|                                  |                      |                 | WP_279838774.1 | PhoX         |                                                                                         |
|                                  |                      |                 | WP_279839461.1 | PhoD         |                                                                                         |
|                                  |                      |                 | WP_279839645.1 | PhoD         |                                                                                         |
| <i>Cobetia</i> sp. 1CM21F*       | <i>C. amphilecti</i> | GCF_023161745.1 | WP_248377282.1 | <b>PhoA*</b> | Sea cave (Portugal: Algarve)                                                            |
|                                  |                      |                 | WP_248377879.1 | PhoX         |                                                                                         |
|                                  |                      |                 | WP_248378997.1 | PafA         |                                                                                         |
|                                  |                      |                 | WP_248380112.1 | PhoD         |                                                                                         |
|                                  |                      |                 | WP_248380900.1 | PhoD         |                                                                                         |
| <i>C. amphilecti</i> NRIC 0815T* | <i>C. amphilecti</i> | GCA_030010415.1 | WP_284726718.1 | PhoD         | The finger sponge <i>A. digitatus</i> (The Sea of Okhotsk, Sakhalin Island, Piltun Bay) |
|                                  |                      |                 | WP_284726808.1 | <b>PhoA*</b> |                                                                                         |
|                                  |                      |                 | WP_284726995.1 | PhoX         |                                                                                         |
|                                  |                      |                 | WP_284727213.1 | PhoD         |                                                                                         |
|                                  |                      |                 | WP_284727576.1 | PafA         |                                                                                         |
| <i>Cobetia</i> sp. AM6*          | <i>C. amphilecti</i> | GCF_009617955.1 | WP_172978613.1 | PhoD         | Exterior surface of the shell of an abalone sold in a fish market (Tokyo, Japan)        |
|                                  |                      |                 | WP_153635520.1 | PafA         |                                                                                         |
|                                  |                      |                 | WP_153635957.1 | PhoX         |                                                                                         |
|                                  |                      |                 | WP_242007665.1 | <b>PhoA*</b> |                                                                                         |
|                                  |                      |                 | WP_153636482.1 | PhoD         |                                                                                         |
| <i>Cobetia</i> sp. 2AS1          | <i>C. amphilecti</i> | GCF_014876835.1 | WP_192837404.1 | PhoD         | Coastal sediment (Russia: the Sea of Japan, Nakhodka harbor)                            |
|                                  |                      |                 | WP_192838056.1 | PafA         |                                                                                         |
|                                  |                      |                 | WP_225996507.1 | PhoD         |                                                                                         |
|                                  |                      |                 | WP_192839216.1 | PhoX         |                                                                                         |
|                                  |                      |                 | WP_192838056.1 | PafA         |                                                                                         |
| <i>Cobetia</i> sp. 2AS           | <i>C. amphilecti</i> | GCF_029846355.1 | WP_192839216.1 | PhoX         | Sediments (Russia: the Sea of Japan, Vostok Bay)                                        |
|                                  |                      |                 | WP_225996507.1 | PhoD         |                                                                                         |
|                                  |                      |                 | WP_192837404.1 | PhoD         |                                                                                         |
|                                  |                      |                 | WP_249330383.1 | PhoD         |                                                                                         |
|                                  |                      |                 | WP_279830791.1 | PafA         |                                                                                         |
| <i>C. litoralis</i> NRIC 0814T   | <i>C. amphilecti</i> | GCF_029846315.1 | WP_279833222.1 | PhoX         | Sandy sediment (Russia: the Sea of Japan)                                               |

|                                           |                      |                 |                |      |                                                                                                |
|-------------------------------------------|----------------------|-----------------|----------------|------|------------------------------------------------------------------------------------------------|
|                                           |                      |                 | WP_279832006.1 | PhoD |                                                                                                |
|                                           |                      |                 | WP_249330383.1 | PhoD | Fish-landing facility                                                                          |
| <i>Cobetia</i> sp. MC34                   | <i>C. amphilecti</i> | GCF_018340035.1 | WP_213114436.1 | PhoX | (Norway: Troms, Tromsvik)                                                                      |
|                                           |                      |                 | WP_213114659.1 | PhoD |                                                                                                |
|                                           |                      |                 | WP_279835410.1 | PhoD | The finger sponge                                                                              |
| <i>Cobetia</i> sp. 29-18-1                | <i>C. amphilecti</i> | GCF_029846405.1 | WP_279835708.1 | PhoX | <i>Amphilectus digitatus</i>                                                                   |
|                                           |                      |                 | WP_279836670.1 | PafA | (The Sea of Okhotsk, Sakhalin Island, Piltun Bay)                                              |
|                                           |                      |                 | WP_279836807.1 | PhoD |                                                                                                |
|                                           |                      |                 | WP_215824272.1 | PafA | Current Humbolt system, <i>Heterostera chilensis</i> (Chile: Puerto Aldea)                     |
| <i>Cobetia</i> sp. 4B                     | <i>C. amphilecti</i> | GCF_018831605.1 | WP_240548688.1 | PhoD |                                                                                                |
|                                           |                      |                 | WP_215822940.1 | PhoX |                                                                                                |
|                                           |                      |                 | WP_215823407.1 | PhoD |                                                                                                |
|                                           |                      |                 | WP_225347537.1 | PhoD | The marine sediment (Atlantic Ocean: Scotia Sea)                                               |
| <i>C. amphilecti</i> N-80                 | <i>C. amphilecti</i> | GCF_020217465.1 | WP_225347908.1 | PafA |                                                                                                |
|                                           |                      |                 | WP_225346724.1 | PhoX |                                                                                                |
|                                           |                      |                 | WP_225347230.1 | PhoD |                                                                                                |
|                                           |                      |                 | WP_253061861.1 | PafA | Coral surface mucus layer and tissue, <i>Diploria labyrinthiformis</i> (USA: FL, Dry Tortugas) |
| <i>Cobetia</i> sp. Dlab-2-U               | <i>Cobetia</i> sp.   | GCF_024124585.1 | WP_253063154.1 | PhoD |                                                                                                |
|                                           |                      |                 | WP_253064500.1 | PhoX |                                                                                                |
|                                           |                      |                 | WP_253064933.1 | PhoD |                                                                                                |
|                                           |                      |                 | WP_253061861.1 | PafA | Coral surface mucus layer and tissue, <i>Diploria labyrinthiformis</i> (USA: FL, Dry Tortugas) |
| <i>Cobetia</i> sp. Dlab-2-AX              | <i>Cobetia</i> sp.   | GCF_024124625.1 | WP_253063154.1 | PhoD |                                                                                                |
|                                           |                      |                 | WP_253064500.1 | PhoX |                                                                                                |
|                                           |                      |                 | WP_253064933.1 | PhoD |                                                                                                |
|                                           |                      |                 | WP_175089240.1 | PhoD | Aquarium water (Brazil: Rio de Janeiro)                                                        |
| <i>C. marina</i> 402                      | <i>Cobetia</i> sp.   | GCF_013350055.1 | WP_175090103.1 | PhoX |                                                                                                |
|                                           |                      |                 | WP_254627190.1 | PhoD |                                                                                                |
|                                           |                      |                 | WP_175090544.1 | PafA |                                                                                                |
|                                           |                      |                 | WP_233593417.1 | PhoD | Rotten brown algae, <i>Sargassum fusiforme</i> (China: Zhejiang)                               |
| <i>Cobetia</i> sp. cqz5-12                | <i>Cobetia</i> sp.   | GCF_016495405.1 | WP_200019524.1 | PafA |                                                                                                |
|                                           |                      |                 | WP_200016943.1 | PhoX |                                                                                                |
|                                           |                      |                 | WP_200017549.1 | PhoD |                                                                                                |
|                                           |                      |                 | WP_240916767.1 | PhoD | Sea cucumber gut (Viet Nam: Hon Tre, Nha Trang Bay)                                            |
| <i>Cobetia</i> sp. MB87                   | <i>Cobetia</i> sp.   | GCF_011319755.1 | WP_166020003.1 | PhoD |                                                                                                |
|                                           |                      |                 | WP_084208519.1 | PhoX | Namhae, the red algae                                                                          |
| <i>C. pacifica</i> GPM2                   | <i>C. marina</i>     | GCF_009931455.1 | WP_254696557.1 | PhoD | <i>Pyropia tenera</i> (South Korea)                                                            |
|                                           |                      |                 | WP_254696414.1 | PhoD |                                                                                                |
|                                           |                      |                 | WP_279854649.1 | PhoX | The red algae                                                                                  |
| <i>Cobetia</i> sp. 10Alg 146              | <i>C. marina</i>     | GCF_029846385.1 | WP_279856192.1 | PhoD | <i>Ahnfeltia tobuchiensis</i> (Russia: The Sea of Okhotsk, Kuril Isles)                        |
|                                           |                      |                 | WP_279856235.1 | PhoD |                                                                                                |
|                                           |                      |                 | WP_240499655.1 | PhoD | Coastal seawater (Russia: The Sea of Japan, Vostok Bay)                                        |
| <i>Cobetia</i> sp. 3AK                    | <i>C. marina</i>     | GCF_029846335.1 | WP_279874635.1 | PhoD |                                                                                                |
|                                           |                      |                 | WP_084208519.1 | PhoX |                                                                                                |
|                                           |                      |                 | WP_284728477.1 | PhoD | Sandy sediment (Russia: the Sea of Japan)                                                      |
| <i>C. pacifica</i> NRIC 0813 <sup>T</sup> | <i>C. marina</i>     | GCA_030010515.1 | WP_240704267.1 | PhoX |                                                                                                |
|                                           |                      |                 | WP_084208519.1 | PhoX |                                                                                                |
| <i>Cobetia</i> sp. MMG027                 | <i>C. marina</i>     | GCF_027947415.1 | WP_271302424.1 | PhoD | missing (USA: Mission Beach, San Diego)                                                        |
|                                           |                      |                 | WP_084208519.1 | PhoX |                                                                                                |

|                                          |                       |                 |                |               |                             |
|------------------------------------------|-----------------------|-----------------|----------------|---------------|-----------------------------|
|                                          |                       |                 | WP_240499655.1 | PhoD          |                             |
| <i>C. marina</i>                         | <i>C. marina</i>      | GCF_900119965.1 | WP_077375791.1 | PhoX          | Eulitoral intertidal        |
| MM1IDA2H-1AD                             |                       |                 | WP_255303155.1 | PhoD          | pond at sea level           |
|                                          |                       |                 | WP_258038356.1 | PhoD          | (Chile: Valparaiso)         |
|                                          |                       |                 | WP_255303113.1 | PhoD          | Seaweed (Japan: Iwate,      |
| <i>Cobetia</i> sp. 5-11-6-3              | <i>C. marina</i>      | GCF_013374055.1 | WP_255303155.1 | PhoD          | Ofunato Bay)                |
|                                          |                       |                 | WP_084208519.1 | PhoX          |                             |
|                                          |                       |                 | WP_240704252.1 | PhoD          | Salt water (USA: New        |
| <i>C. marina</i> T1                      | <i>C. marina</i>      | GCF_005144735.1 | WP_240704267.1 | PhoD          | Hampshire, Hampton          |
|                                          |                       |                 | WP_136939347.1 | PhoX          | Beach)                      |
| <i>C. marina</i> NBRC                    | <i>C. marina</i>      | GCF_006540105.1 | WP_136939347.1 | PhoX          | missing                     |
| 15607                                    |                       |                 | WP_240704267.1 | PhoX          |                             |
|                                          |                       |                 | WP_255304446.1 | PhoD          | Seaweed (Japan: Iwate,      |
| <i>Cobetia</i> sp. 5-25-4-2              | <i>C. marina</i>      | GCF_013374075.1 | WP_255304452.1 | PhoD          | Ofunato Bay)                |
|                                          |                       |                 | WP_176494061.1 | PhoX          |                             |
|                                          |                       |                 | WP_127734507.1 | PhoD          | The green algae <i>Ulva</i> |
| <i>Cobetia</i> sp. ICG0124               | <i>C. marina</i>      | GCF_004006355.1 | WP_084208519.1 | PhoX          | (United Kingdom:            |
|                                          |                       |                 | WP_240665388.1 | PhoD          | Aberystwyth)                |
|                                          |                       |                 | WP_240499655.1 | PhoD          | Littoral water sample       |
| <i>C. marina</i> JCM                     | <i>C. marina</i>      | GCF_001720485.1 | WP_084208519.1 | PhoX          | (USA: Woods                 |
| 21022 <sup>T</sup>                       |                       |                 | WP_240499593.1 | PhoD          | Hole, MA)                   |
|                                          |                       |                 | WP_233266401.1 | PhoD          | Beach, brown algae          |
|                                          |                       |                 | WP_024952594.1 | PhoX          | (Arctic Ocean)              |
| <i>Cobetia</i> sp. L2A1                  | <i>Cobetia</i> sp.    | GCF_009796845.1 | WP_158773983.1 | PafA          |                             |
|                                          |                       |                 | WP_158774142.1 | PhoX          |                             |
|                                          |                       |                 | WP_158774696.1 | PhoD          |                             |
|                                          |                       |                 | WP_246116512.1 | <b>PhoA</b> * | Seawater (China:            |
| <i>Cobetia</i> sp. QF-1*                 | <i>C. crustatorum</i> | GCF_002213105.1 | WP_088743230.1 | PhoD          | Qingdao)                    |
|                                          |                       |                 | WP_088743763.1 | PhoX          |                             |
|                                          |                       |                 | WP_088743908.1 | PhoX          |                             |
|                                          |                       |                 | WP_144726746.1 | PhoD          | Surface seawater            |
| <i>C. crustatorum</i>                    | <i>C. crustatorum</i> | GCF_007786215.1 | WP_088743763.1 | PhoD          | (Kongsfjorden, Arctic)      |
| SM1923*                                  |                       |                 | WP_144727163.1 | PhoX          |                             |
|                                          |                       |                 | WP_246116512.1 | <b>PhoA</b> * |                             |
|                                          |                       |                 | WP_144728015.1 | PhoD          |                             |
|                                          |                       |                 | WP_248623642.1 | <b>PhoA</b> * | Fermented shrimp            |
| <i>C. crustatorum</i> JO1 <sup>T</sup> * | <i>C. crustatorum</i> | GCF_000591415.1 | WP_282705494.1 | PhoD          | (South Korea: Daejeon)      |
|                                          |                       |                 | WP_282705495.1 | PhoD          |                             |
|                                          |                       |                 | WP_024952594.1 | PhoX          |                             |

\* The strains containing **PhoA** family.
