# Supplementary material for: LPS-Dephosphorylating Cobetia amphilecti Alkaline Phosphatase of PhoA Family Divergent from the Multiple Homologues of Cobetia spp
Source: MDPI journal article supplement (doi:10.3390/microorganisms12030631), 2024-03-21
Supplement: s1 [file s1]

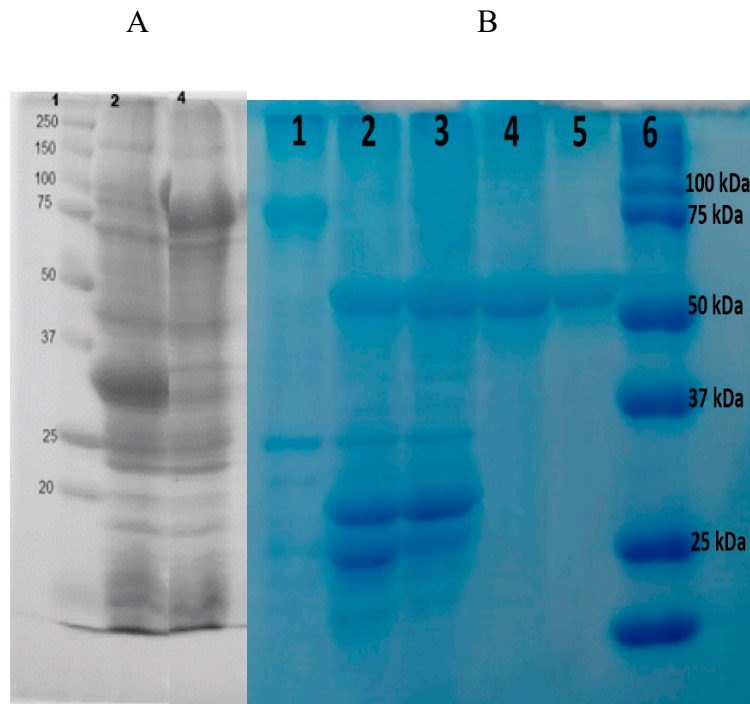

**Figure S1.** **A** - Electrophoregram of protein lysates from the recombinant cultures *E. coli* Rosetta (DE3)/Pho40: lanes 1 – the protein weight markers for electrophoresis, kDa (BioRad, USA); lane 2 – the cell extract from the control strain *E. coli* Rosetta (DE3)/pET-40b(+) after IPTG-induced expression (a band corresponding to a molecular mass  $\approx 30$  kDa is of the empty plasmid chaperon DsbC); lane 4 – the cell extract from the recombinant colonies of *E. coli* Rosetta (DE3)/Pho40 after IPTG-induced expression (the band corresponding to a molecular weight  $\approx 90$  kDa are the recombinant hybrid proteins DsbC/CmAP). **B** - Electrophoregram of the recombinant alkaline phosphatase CmAP at the different stages of purification: lane 1 - after metal affinity chromatography ( $\approx 90$  kDa); lanes 2-3 – after removing the plasmid chaperon due to incubation with enteropeptidase L-HEP ( $\approx 55$  kDa); lanes 4-5 - after ion exchange chromatography ( $\approx 55$  kDa); M- the protein weight markers for electrophoresis, kDa (BioRad, USA).
