# Supplementary material for: LPS-Dephosphorylating Cobetia amphilecti Alkaline Phosphatase of PhoA Family Divergent from the Multiple Homologues of Cobetia spp
Source: Microorganisms. 2024 Mar 21;12(3):631. doi: 10.3390/microorganisms12030631 (PMC10974088; doi:10.3390/microorganisms12030631)
Supplement: Supplementary file 1 [file microorganisms-12-00631-s001.zip]

Archive with 4 entries (4 files):
- Figure S1 Electrophoresis.pdf
- Figure S2 Multiple alignment.jpg
- Table S1 ALP_blast.xlsx
- Table S2 ALP content.pdf
