# Supplementary material for: LPS-Dephosphorylating Cobetia amphilecti Alkaline Phosphatase of PhoA Family Divergent from the Multiple Homologues of Cobetia spp
Source: Microorganisms. 2024 Mar 21;12(3):631. doi: 10.3390/microorganisms12030631 (PMC10974088; doi:10.3390/microorganisms12030631)
Supplement: Supplementary file 1 [file microorganisms-12-00631-s001.zip › Table S1 ALP_blast.xlsx]

## Sheet: ALP neighbors
X1	X2	X3	X4	X5	X6	X7	X8	X9	X10	X11	X12	X13	X14	X15	X16	X17	X18	X19	X20	X21
1.Cobetia_sp_UCD-24C_GCF_001306765.1.gtf	NA |capsule biosynthesis protein CapK	NA |aminotransferase DegT	NA |glucosamine--fructose-6-phosphate aminotransferase	NA |nitric oxide synthase	NA |PsiE family protein	NA |DnaA regulatory inactivator Hda	NA |phosphoribosylglycinamide formyltransferase	dcd |NA	dcd |deoxycytidine triphosphate deaminase	metG |NA	metG |methionine--tRNA ligase	NA |electron transporter RsxA	NA |electron transporter RnfB	NA |electron transporter RnfD	NA |electron transporter RnfE	NA |endonuclease III	pepN |NA	pepN |aminopeptidase	NA |glycerate kinase	NA |nucleotide-binding protein
10.Cobetia_amphilecti_NRIC_0815T_GCA_030010415.1.gtf	NA |autotransporter domain-containing SGNH/GDSL hydrolase family protein	dcd |NA	dcd |dCTP deaminase	apbC |NA	apbC |iron-sulfur cluster carrier protein ApbC	NA |RNA pseudouridine synthase	NA |cell wall hydrolase	NA |alkaline phosphatase	NA |TerB family tellurite resistance protein	metG |NA	metG |methionine--tRNA ligase	NA |DUF3465 domain-containing protein	rsxA |NA	rsxA |electron transport complex subunit RsxA	rsxB |NA	rsxB |electron transport complex subunit RsxB	rsxC |NA	rsxC |electron transport complex subunit RsxC	NA |heavy metal translocating P-type ATPase	NA |MerR family DNA-binding protein
11.Cobetia_sp_4B_GCF_018831605.1.gtf	purN |phosphoribosylglycinamide formyltransferase	NA |autotransporter domain-containing protein	dcd |NA	dcd |dCTP deaminase	apbC |NA	apbC |iron-sulfur cluster carrier protein ApbC	NA |RNA pseudouridine synthase	NA |cell wall hydrolase	NA |TerB family tellurite resistance protein	metG |NA	metG |methionine--tRNA ligase	NA |DUF3465 domain-containing protein	rsxA |NA	rsxA |electron transport complex subunit RsxA	rsxB |NA	rsxB |electron transport complex subunit RsxB	rsxC |NA	rsxC |electron transport complex subunit RsxC	rsxD |NA	rsxD |electron transport complex subunit RsxD
12.Cobetia_sp_AM6_GCF_009617955.1.gtf	NA |autotransporter domain-containing protein	dcd |NA	dcd |dCTP deaminase	apbC |NA	apbC |iron-sulfur cluster carrier protein ApbC	NA |RNA pseudouridine synthase	NA |cell wall hydrolase	NA |alkaline phosphatase	NA |TerB family tellurite resistance protein	metG |NA	metG |methionine--tRNA ligase	NA |DUF3465 domain-containing protein	rsxA |NA	rsxA |electron transport complex subunit RsxA	rsxB |NA	rsxB |electron transport complex subunit RsxB	rsxC |NA	rsxC |electron transport complex subunit RsxC	rsxD |NA	rsxD |electron transport complex subunit RsxD
14.Cobetia_amphilecti_KMM_296_GCF_000754225.1.gtf	rsxD |NA	rsxD |electron transport complex subunit RsxD	rsxC |NA	rsxC |electron transport complex subunit RsxC	rsxB |NA	rsxB |electron transport complex subunit RsxB	rsxA |NA	rsxA |electron transport complex subunit RsxA	NA |DUF3465 domain-containing protein	metG |NA	metG |methionine--tRNA ligase	NA |TerB family tellurite resistance protein	NA |alkaline phosphatase	NA |cell wall hydrolase	NA |RNA pseudouridine synthase	apbC |NA	apbC |iron-sulfur cluster carrier protein ApbC	dcd |NA	dcd |dCTP deaminase	NA |autotransporter domain-containing SGNH/GDSL hydrolase family protein
15.Cobetia_sp_Dlab-2-U_GCF_024124585.1.gtf	rsxD |NA	rsxD |electron transport complex subunit RsxD	rsxC |NA	rsxC |electron transport complex subunit RsxC	rsxB |NA	rsxB |electron transport complex subunit RsxB	rsxA |NA	rsxA |electron transport complex subunit RsxA	NA |DUF3465 domain-containing protein	metG |NA	metG |methionine--tRNA ligase	NA |TerB family tellurite resistance protein	NA |cell wall hydrolase	NA |RNA pseudouridine synthase	apbC |NA	apbC |iron-sulfur cluster carrier protein ApbC	dcd |NA	dcd |dCTP deaminase	NA |autotransporter domain-containing protein	purN |NA
16.Cobetia_sp_Dlab-2-AX_GCF_024124625.1.gtf	purN |phosphoribosylglycinamide formyltransferase	NA |autotransporter domain-containing protein	dcd |NA	dcd |dCTP deaminase	apbC |NA	apbC |iron-sulfur cluster carrier protein ApbC	NA |RNA pseudouridine synthase	NA |cell wall hydrolase	NA |TerB family tellurite resistance protein	metG |NA	metG |methionine--tRNA ligase	NA |DUF3465 domain-containing protein	rsxA |NA	rsxA |electron transport complex subunit RsxA	rsxB |NA	rsxB |electron transport complex subunit RsxB	rsxC |NA	rsxC |electron transport complex subunit RsxC	rsxD |NA	rsxD |electron transport complex subunit RsxD
17.Cobetia_marina_402_GCF_013350055.1.gtf	rsxD |NA	rsxD |electron transport complex subunit RsxD	rsxC |NA	rsxC |electron transport complex subunit RsxC	rsxB |NA	rsxB |electron transport complex subunit RsxB	rsxA |NA	rsxA |electron transport complex subunit RsxA	NA |DUF3465 domain-containing protein	metG |NA	metG |methionine--tRNA ligase	NA |TerB family tellurite resistance protein	NA |cell wall hydrolase	NA |RNA pseudouridine synthase	apbC |NA	apbC |iron-sulfur cluster carrier protein ApbC	dcd |NA	dcd |dCTP deaminase	NA |autotransporter domain-containing protein	purN |NA
18.Cobetia_sp_Cqz5-12_GCF_016495405.1.gtf	purN |phosphoribosylglycinamide formyltransferase	NA |autotransporter domain-containing protein	dcd |NA	dcd |dCTP deaminase	apbC |NA	apbC |iron-sulfur cluster carrier protein ApbC	NA |RNA pseudouridine synthase	NA |cell wall hydrolase	NA |TerB family tellurite resistance protein	metG |NA	metG |methionine--tRNA ligase	NA |DUF3465 domain-containing protein	rsxA |NA	rsxA |electron transport complex subunit RsxA	rsxB |NA	rsxB |electron transport complex subunit RsxB	rsxC |NA	rsxC |electron transport complex subunit RsxC	rsxD |NA	rsxD |electron transport complex subunit RsxD
19.Cobetia_sp_MB87_GCF_011319755.1.gtf	purN |phosphoribosylglycinamide formyltransferase	NA |autotransporter domain-containing protein	dcd |NA	dcd |dCTP deaminase	apbC |NA	apbC |iron-sulfur cluster carrier protein ApbC	NA |RNA pseudouridine synthase	NA |cell wall hydrolase	NA |TerB family tellurite resistance protein	metG |NA	metG |methionine--tRNA ligase	NA |DUF3465 domain-containing protein	rsxA |NA	rsxA |electron transport complex subunit RsxA	rsxB |NA	rsxB |electron transport complex subunit RsxB	rsxC |NA	rsxC |electron transport complex subunit RsxC	rsxD |NA	rsxD |electron transport complex subunit RsxD
2.Cobetia_amphilecti_B2M13_GCF_018860945.1.gtf	NA |autotransporter domain-containing protein	dcd |NA	dcd |dCTP deaminase	apbC |NA	apbC |iron-sulfur cluster carrier protein ApbC	NA |RNA pseudouridine synthase	NA |cell wall hydrolase	NA |alkaline phosphatase	NA |TerB family tellurite resistance protein	metG |NA	metG |methionine--tRNA ligase	NA |DUF3465 domain-containing protein	rsxA |NA	rsxA |electron transport complex subunit RsxA	rsxB |NA	rsxB |electron transport complex subunit RsxB	rsxC |NA	rsxC |electron transport complex subunit RsxC	rsxD |NA	rsxD |electron transport complex subunit RsxD
2.Cobetia_amphilecti_B2M13_GCF_018860945.1.gtf	purN |phosphoribosylglycinamide formyltransferase	NA |autotransporter domain-containing protein	dcd |NA	dcd |dCTP deaminase	apbC |NA	apbC |iron-sulfur cluster carrier protein ApbC	NA |RNA pseudouridine synthase	NA |cell wall hydrolase	NA |TerB family tellurite resistance protein	metG |NA	metG |methionine--tRNA ligase	NA |DUF3465 domain-containing protein	rsxA |NA	rsxA |electron transport complex subunit RsxA	rsxB |NA	rsxB |electron transport complex subunit RsxB	rsxC |NA	rsxC |electron transport complex subunit RsxC	rsxD |NA	rsxD |electron transport complex subunit RsxD
20.Cobetia_pacifica_GPM2_GCF_009931455.1.gtf	purN |phosphoribosylglycinamide formyltransferase	NA |autotransporter domain-containing protein	dcd |NA	dcd |dCTP deaminase	apbC |NA	apbC |iron-sulfur cluster carrier protein ApbC	NA |RNA pseudouridine synthase	NA |cell wall hydrolase	NA |TerB family tellurite resistance protein	metG |NA	metG |methionine--tRNA ligase	NA |DUF3465 domain-containing protein	rsxA |NA	rsxA |electron transport complex subunit RsxA	rsxB |NA	rsxB |electron transport complex subunit RsxB	rsxC |NA	rsxC |electron transport complex subunit RsxC	rsxD |NA	rsxD |electron transport complex subunit RsxD
21.Cobetia_sp_10Alg_146_GCF_029846385.1.gtf	purM |phosphoribosylformylglycinamidine cyclo-ligase	purN |NA	purN |phosphoribosylglycinamide formyltransferase	NA |autotransporter domain-containing protein	apbC |NA	apbC |iron-sulfur cluster carrier protein ApbC	NA |RNA pseudouridine synthase	NA |cell wall hydrolase	NA |TerB family tellurite resistance protein	metG |NA	metG |methionine--tRNA ligase	NA |DUF3465 domain-containing protein	rsxA |NA	rsxA |electron transport complex subunit RsxA	rsxB |NA	rsxB |electron transport complex subunit RsxB	rsxC |NA	rsxC |electron transport complex subunit RsxC	mtgA |NA	mtgA |monofunctional biosynthetic peptidoglycan transglycosylase
22.Cobetia_sp_3AK_GCF_029846335.1.gtf	rsxD |NA	rsxD |electron transport complex subunit RsxD	rsxC |NA	rsxC |electron transport complex subunit RsxC	rsxB |NA	rsxB |electron transport complex subunit RsxB	rsxA |NA	rsxA |electron transport complex subunit RsxA	NA |DUF3465 domain-containing protein	metG |NA	metG |methionine--tRNA ligase	NA |TerB family tellurite resistance protein	NA |cell wall hydrolase	NA |RNA pseudouridine synthase	apbC |NA	apbC |iron-sulfur cluster carrier protein ApbC	dcd |NA	dcd |dCTP deaminase	NA |autotransporter domain-containing protein	purN |NA
23.Cobetia_pacifica_NRIC_0813T_GCF_030010515.1.gtf	NA |autotransporter domain-containing protein	dcd |NA	dcd |dCTP deaminase	apbC |NA	apbC |iron-sulfur cluster carrier protein ApbC	NA |RNA pseudouridine synthase	NA |cell wall hydrolase	NA |alkaline phosphatase	NA |TerB family tellurite resistance protein	metG |NA	metG |methionine--tRNA ligase	NA |DUF3465 domain-containing protein	rsxA |NA	rsxA |electron transport complex subunit RsxA	rsxB |NA	rsxB |electron transport complex subunit RsxB	rsxC |NA	rsxC |electron transport complex subunit RsxC	rsxD |NA	rsxD |electron transport complex subunit RsxD
24.Cobetia_sp_MMG027_GCF_027947415.1.gtf	purN |phosphoribosylglycinamide formyltransferase	NA |autotransporter domain-containing protein	dcd |NA	dcd |dCTP deaminase	apbC |NA	apbC |iron-sulfur cluster carrier protein ApbC	NA |RNA pseudouridine synthase	NA |cell wall hydrolase	NA |TerB family tellurite resistance protein	metG |NA	metG |methionine--tRNA ligase	NA |DUF3465 domain-containing protein	rsxA |NA	rsxA |electron transport complex subunit RsxA	rsxB |NA	rsxB |electron transport complex subunit RsxB	rsxC |NA	rsxC |electron transport complex subunit RsxC	rsxD |NA	rsxD |electron transport complex subunit RsxD
25.Cobetia_sp_MM1IDA2H-1_GCF_002916775.1.gtf	purN |phosphoribosylglycinamide formyltransferase	NA |autotransporter domain-containing protein	dcd |NA	dcd |dCTP deaminase	apbC |NA	apbC |iron-sulfur cluster carrier protein ApbC	NA |RNA pseudouridine synthase	NA |cell wall hydrolase	NA |TerB family tellurite resistance protein	metG |NA	metG |methionine--tRNA ligase	NA |DUF3465 domain-containing protein	rsxA |NA	rsxA |electron transport complex subunit RsxA	rsxB |NA	rsxB |electron transport complex subunit RsxB	rsxC |NA	rsxC |electron transport complex subunit RsxC	rsxD |NA	rsxD |electron transport complex subunit RsxD
26.Cobetia_marina_MM1IDA2H-1AD_GCF_900119965.1.gtf	purN |phosphoribosylglycinamide formyltransferase	NA |autotransporter domain-containing protein	dcd |NA	dcd |dCTP deaminase	apbC |NA	apbC |iron-sulfur cluster carrier protein ApbC	NA |RNA pseudouridine synthase	NA |cell wall hydrolase	NA |TerB family tellurite resistance protein	metG |NA	metG |methionine--tRNA ligase	NA |DUF3465 domain-containing protein	rsxA |NA	rsxA |electron transport complex subunit RsxA	rsxB |NA	rsxB |electron transport complex subunit RsxB	rsxC |NA	rsxC |electron transport complex subunit RsxC	rsxD |NA	rsxD |electron transport complex subunit RsxD
27.Cobetia_sp_5-11-6-3_GCF_013374055.1.gtf	rsxD |NA	rsxD |electron transport complex subunit RsxD	rsxC |NA	rsxC |electron transport complex subunit RsxC	rsxB |NA	rsxB |electron transport complex subunit RsxB	rsxA |NA	rsxA |electron transport complex subunit RsxA	NA |DUF3465 domain-containing protein	metG |NA	metG |methionine--tRNA ligase	NA |TerB family tellurite resistance protein	NA |cell wall hydrolase	NA |RNA pseudouridine synthase	apbC |NA	apbC |iron-sulfur cluster carrier protein ApbC	dcd |NA	dcd |dCTP deaminase	NA |autotransporter domain-containing protein	purN |NA
28.Cobetia_marinaT1_GCF_005144735.1.gtf	purN |phosphoribosylglycinamide formyltransferase	NA |autotransporter domain-containing protein	dcd |NA	dcd |dCTP deaminase	apbC |NA	apbC |iron-sulfur cluster carrier protein ApbC	NA |RNA pseudouridine synthase	NA |cell wall hydrolase	NA |TerB family tellurite resistance protein	metG |NA	metG |methionine--tRNA ligase	NA |DUF3465 domain-containing protein	rsxA |NA	rsxA |electron transport complex subunit RsxA	rsxB |NA	rsxB |electron transport complex subunit RsxB	rsxC |NA	rsxC |electron transport complex subunit RsxC	rsxD |NA	rsxD |electron transport complex subunit RsxD
29.Cobetia_marina_NBRC_15607_GCF_006540105.1.gtf	NA |electron transfer flavoprotein subunit beta	NA |DUF4174 domain-containing protein	NA |DUF4168 domain-containing protein	NA |NAD(P)H-dependent oxidoreductase subunit E	NA |RHS repeat-associated core domain-containing protein	NA |HNH/endonuclease VII fold putative polymorphic toxin	NA |Imm50 family immunity protein	NA |cell wall hydrolase	NA |TerB family tellurite resistance protein	metG |NA	metG |methionine--tRNA ligase	NA |DUF3465 domain-containing protein	rsxA |NA	rsxA |electron transport complex subunit RsxA	rsxB |NA	rsxB |electron transport complex subunit RsxB	rsxC |NA	rsxC |electron transport complex subunit RsxC	NA |heavy metal-binding domain-containing protein	ggt |NA
3.Cobetia_sp_2AS1_GCF_014876835.1.gtf	rsxD |NA	rsxD |electron transport complex subunit RsxD	rsxC |NA	rsxC |electron transport complex subunit RsxC	rsxB |NA	rsxB |electron transport complex subunit RsxB	rsxA |NA	rsxA |electron transport complex subunit RsxA	NA |DUF3465 domain-containing protein	metG |NA	metG |methionine--tRNA ligase	NA |TerB family tellurite resistance protein	NA |cell wall hydrolase	NA |RNA pseudouridine synthase	apbC |NA	apbC |iron-sulfur cluster carrier protein ApbC	dcd |NA	dcd |dCTP deaminase	NA |autotransporter domain-containing protein	purN |NA
30.Cobetia_sp_5-25-4-2_GCF_013374075.1.gtf	purN |phosphoribosylglycinamide formyltransferase	NA |autotransporter domain-containing protein	dcd |NA	dcd |dCTP deaminase	apbC |NA	apbC |iron-sulfur cluster carrier protein ApbC	NA |RNA pseudouridine synthase	NA |cell wall hydrolase	NA |TerB family tellurite resistance protein	metG |NA	metG |methionine--tRNA ligase	NA |DUF3465 domain-containing protein	rsxA |NA	rsxA |electron transport complex subunit RsxA	rsxB |NA	rsxB |electron transport complex subunit RsxB	rsxC |NA	rsxC |electron transport complex subunit RsxC	rsxD |NA	rsxD |electron transport complex subunit RsxD
31.Cobetia_sp_ICG0124_GCF_004006355.1.gtf	rsxD |NA	rsxD |electron transport complex subunit RsxD	rsxC |NA	rsxC |electron transport complex subunit RsxC	rsxB |NA	rsxB |electron transport complex subunit RsxB	rsxA |NA	rsxA |electron transport complex subunit RsxA	NA |DUF3465 domain-containing protein	metG |NA	metG |methionine--tRNA ligase	NA |cell wall hydrolase	NA |RNA pseudouridine synthase	apbC |NA	apbC |iron-sulfur cluster carrier protein ApbC	dcd |NA	dcd |dCTP deaminase	NA |autotransporter domain-containing protein	purN |NA	purN |phosphoribosylglycinamide formyltransferase
32.Cobetia_marina_JCM_21022T_GCF_001720485.1.gtf	rsxD |NA	rsxD |electron transport complex subunit RsxD	rsxC |NA	rsxC |electron transport complex subunit RsxC	rsxB |NA	rsxB |electron transport complex subunit RsxB	rsxA |NA	rsxA |electron transport complex subunit RsxA	NA |DUF3465 domain-containing protein	metG |NA	metG |methionine--tRNA ligase	NA |TerB family tellurite resistance protein	NA |cell wall hydrolase	NA |RNA pseudouridine synthase	apbC |NA	apbC |iron-sulfur cluster carrier protein ApbC	dcd |NA	dcd |dCTP deaminase	NA |autotransporter domain-containing protein	purN |NA
33.Cobetia_sp_L2A1_GCF_009796845.1.gtf	purN |NA	purN |phosphoribosylglycinamide formyltransferase	NA |autotransporter domain-containing SGNH/GDSL hydrolase family protein	dcd |NA	dcd |dCTP deaminase	apbC |NA	apbC |iron-sulfur cluster carrier protein ApbC	NA |RNA pseudouridine synthase	NA |cell wall hydrolase	metG |NA	metG |methionine--tRNA ligase	NA |DUF3465 domain-containing protein	rsxA |NA	rsxA |electron transport complex subunit RsxA	rsxB |NA	rsxB |electron transport complex subunit RsxB	rsxC |NA	rsxC |electron transport complex subunit RsxC	NA |RnfABCDGE type electron transport complex subunit D	rsxG |NA
34.Cobetia_sp_QF-1_GCF_002213105.1.gtf	rsxD |NA	rsxD |electron transport complex subunit RsxD	rsxC |NA	rsxC |electron transport complex subunit RsxC	rsxB |NA	rsxB |electron transport complex subunit RsxB	rsxA |NA	rsxA |electron transport complex subunit RsxA	NA |DUF3465 domain-containing protein	metG |NA	metG |methionine--tRNA ligase	NA |TerB family tellurite resistance protein	NA |alkaline phosphatase	NA |cell wall hydrolase	NA |RNA pseudouridine synthase	apbC |NA	apbC |iron-sulfur cluster carrier protein ApbC	dcd |NA	dcd |dCTP deaminase	NA |autotransporter domain-containing SGNH/GDSL hydrolase family protein
35.Cobetia_crustatorum_SM1923_GCF_007786215.1.gtf	rsxD |NA	rsxD |electron transport complex subunit RsxD	rsxC |NA	rsxC |electron transport complex subunit RsxC	rsxB |NA	rsxB |electron transport complex subunit RsxB	rsxA |NA	rsxA |electron transport complex subunit RsxA	NA |DUF3465 domain-containing protein	metG |NA	metG |methionine--tRNA ligase	NA |TerB family tellurite resistance protein	NA |alkaline phosphatase	NA |cell wall hydrolase	NA |RNA pseudouridine synthase	apbC |NA	apbC |iron-sulfur cluster carrier protein ApbC	dcd |NA	dcd |dCTP deaminase	NA |autotransporter domain-containing SGNH/GDSL hydrolase family protein
36.Cobetia_crustatorum_JO1T_GCF_000591415.1.gtf	NA |autotransporter domain-containing SGNH/GDSL hydrolase family protein	dcd |NA	dcd |dCTP deaminase	apbC |NA	apbC |iron-sulfur cluster carrier protein ApbC	NA |RNA pseudouridine synthase	NA |cell wall hydrolase	NA |alkaline phosphatase	NA |TerB family tellurite resistance protein	metG |NA	metG |methionine--tRNA ligase	NA |DUF3465 domain-containing protein	rsxA |NA	rsxA |electron transport complex subunit RsxA	rsxB |NA	rsxB |electron transport complex subunit RsxB	rsxC |NA	rsxC |electron transport complex subunit RsxC	NA |heavy metal translocating P-type ATPase	NA |MerR family DNA-binding protein
4.Cobetia_sp_2AS_GCF_029846355.1.gtf	purN |NA	purN |phosphoribosylglycinamide formyltransferase	NA |autotransporter domain-containing protein	dcd |NA	dcd |dCTP deaminase	apbC |NA	apbC |iron-sulfur cluster carrier protein ApbC	NA |RNA pseudouridine synthase	NA |cell wall hydrolase	metG |NA	metG |methionine--tRNA ligase	NA |DUF3465 domain-containing protein	rsxA |NA	rsxA |electron transport complex subunit RsxA	rsxB |NA	rsxB |electron transport complex subunit RsxB	rsxC |NA	rsxC |electron transport complex subunit RsxC	rsxD |NA	rsxD |electron transport complex subunit RsxD
5.Cobetia_sp_1AS1_GCF_029846435.1.gtf	rsxD |NA	rsxD |electron transport complex subunit RsxD	rsxC |NA	rsxC |electron transport complex subunit RsxC	rsxB |NA	rsxB |electron transport complex subunit RsxB	rsxA |NA	rsxA |electron transport complex subunit RsxA	NA |DUF3465 domain-containing protein	metG |NA	metG |methionine--tRNA ligase	NA |TerB family tellurite resistance protein	NA |alkaline phosphatase	NA |cell wall hydrolase	NA |RNA pseudouridine synthase	apbC |NA	apbC |iron-sulfur cluster carrier protein ApbC	NA |autotransporter domain-containing protein	purN |NA	purN |phosphoribosylglycinamide formyltransferase
6.Cobetia_litoralis_NRIC_0814T_GCF_029846315.1.gtf	rsxD |NA	rsxD |electron transport complex subunit RsxD	rsxC |NA	rsxC |electron transport complex subunit RsxC	rsxB |NA	rsxB |electron transport complex subunit RsxB	rsxA |NA	rsxA |electron transport complex subunit RsxA	NA |DUF3465 domain-containing protein	metG |NA	metG |methionine--tRNA ligase	NA |TerB family tellurite resistance protein	NA |cell wall hydrolase	NA |RNA pseudouridine synthase	apbC |NA	apbC |iron-sulfur cluster carrier protein ApbC	dcd |NA	dcd |dCTP deaminase	NA |autotransporter domain-containing protein	purN |NA
7.Cobetia_sp_MC34_GCF_018340035.1.gtf	purN |phosphoribosylglycinamide formyltransferase	NA |autotransporter domain-containing protein	dcd |NA	dcd |dCTP deaminase	apbC |NA	apbC |iron-sulfur cluster carrier protein ApbC	NA |RNA pseudouridine synthase	NA |cell wall hydrolase	NA |TerB family tellurite resistance protein	metG |NA	metG |methionine--tRNA ligase	NA |DUF3465 domain-containing protein	rsxA |NA	rsxA |electron transport complex subunit RsxA	rsxB |NA	rsxB |electron transport complex subunit RsxB	rsxC |NA	rsxC |electron transport complex subunit RsxC	rsxD |NA	rsxD |electron transport complex subunit RsxD
8.Cobetia_sp_1CM21F_GCF_023161745.1.gtf	rsxD |NA	rsxD |electron transport complex subunit RsxD	rsxC |NA	rsxC |electron transport complex subunit RsxC	rsxB |NA	rsxB |electron transport complex subunit RsxB	rsxA |NA	rsxA |electron transport complex subunit RsxA	NA |DUF3465 domain-containing protein	metG |NA	metG |methionine--tRNA ligase	NA |TerB family tellurite resistance protein	NA |alkaline phosphatase	NA |cell wall hydrolase	NA |RNA pseudouridine synthase	apbC |NA	apbC |iron-sulfur cluster carrier protein ApbC	dcd |NA	dcd |dCTP deaminase	NA |autotransporter domain-containing protein
9.Cobetia_sp_29-18-1_GCF_029846405.1.gtf	purN |phosphoribosylglycinamide formyltransferase	NA |autotransporter domain-containing protein	dcd |NA	dcd |dCTP deaminase	apbC |NA	apbC |iron-sulfur cluster carrier protein ApbC	NA |RNA pseudouridine synthase	NA |cell wall hydrolase	NA |TerB family tellurite resistance protein	metG |NA	metG |methionine--tRNA ligase	NA |DUF3465 domain-containing protein	rsxA |NA	rsxA |electron transport complex subunit RsxA	rsxB |NA	rsxB |electron transport complex subunit RsxB	rsxC |NA	rsxC |electron transport complex subunit RsxC	rsxD |NA	rsxD |electron transport complex subunit RsxD

## Sheet: ALP types
i	strain	seqnames	start	end	gene_id	transcript_id	product	protein_id	gene	branch
#VALUE!	1.Cobetia_sp_UCD-24C_GCF_001306765.1.gtf	NZ_LJTD01000002.1	418534	420255	AOG28_RS04020	unassigned_transcript_816	alkaline phosphatase D family protein	WP_082388216.1	NA	0		0	PhoD unclassified
#VALUE!	10.Cobetia_amphilecti_NRIC_0815T_GCA_030010415.1.gtf	NZ_JASCSA010000005.1	58644	60374	QLT01_RS07690	unassigned_transcript_2570	alkaline phosphatase D family protein	WP_284726718.1	NA	0		1	PhoX unclassified
#VALUE!	11.Cobetia_sp_4B_GCF_018831605.1.gtf	NZ_CP059843.1	620138	621862	H2O77_RS02645	unassigned_transcript_527	alkaline phosphatase D family protein	WP_240548688.1	NA	0		2	PafA unclassified
#VALUE!	11.Cobetia_sp_4B_GCF_018831605.1.gtf	NZ_CP059843.1	2458309	2459139	H2O77_RS10260	unassigned_transcript_2047	alkaline phosphatase family protein	WP_215822940.1	NA	0		3	PhoX unclassified
#VALUE!	12.Cobetia_sp_AM6_GCF_009617955.1.gtf	NZ_AP021868.1	641893	643617	CLAM6_RS02770	unassigned_transcript_553	alkaline phosphatase D family protein	WP_172978613.1	NA	0		4	PhoA homologous KGA01942
#VALUE!	13.Cobetia_amphilecti_N-80_GCF_020217465.1.gtf	NZ_CP084115.1	641538	643262	LCW13_RS02750	unassigned_transcript_550	alkaline phosphatase D family protein	WP_225347537.1	NA	0		5	phoD
#VALUE!	14.Cobetia_amphilecti_KMM_296_GCF_000754225.1.gtf	NZ_JQJA01000016.1	53824	55398	KP05_RS08880	unassigned_transcript_1805	alkaline phosphatase D family protein	WP_043333989.1	NA	0
#VALUE!	15.Cobetia_sp_Dlab-2-U_GCF_024124585.1.gtf	NZ_JAMXRW010000004.1	361297	363018	NH343_RS09410	unassigned_transcript_2494	alkaline phosphatase D family protein	WP_253063154.1	NA	0
#VALUE!	16.Cobetia_sp_Dlab-2-AX_GCF_024124625.1.gtf	NZ_JAMXRV010000004.1	361297	363018	NH396_RS09390	unassigned_transcript_2370	alkaline phosphatase D family protein	WP_253063154.1	NA	0
#VALUE!	16.Cobetia_sp_Dlab-2-AX_GCF_024124625.1.gtf	NZ_JAMXRV010000008.1	177947	178777	NH396_RS13900	unassigned_transcript_3272	alkaline phosphatase family protein	WP_253064500.1	NA	0
#VALUE!	17.Cobetia_marina_402_GCF_013350055.1.gtf	NZ_JABVXD010000015.1	47652	49385	HUS67_RS14640	unassigned_transcript_617	alkaline phosphatase D family protein	WP_254627190.1	NA	0
#VALUE!	18.Cobetia_sp_Cqz5-12_GCF_016495405.1.gtf	NZ_CP044522.1	611200	612906	F8A90_RS02630	unassigned_transcript_526	alkaline phosphatase D family protein	WP_233593417.1	NA	0
#VALUE!	19.Cobetia_sp_MB87_GCF_011319755.1.gtf	NZ_VFBC01000008.1	431229	432935	CDPAHKCJ_RS11270	unassigned_transcript_2562	alkaline phosphatase D family protein	WP_240916767.1	NA	0
#VALUE!	2.Cobetia_amphilecti_B2M13_GCF_018860945.1.gtf	NZ_JAHKQM010000007.1	58603	60327	KO496_RS04605	unassigned_transcript_2121	alkaline phosphatase D family protein	WP_244994940.1	NA	0
#VALUE!	20.Cobetia_pacifica_GPM2_GCF_009931455.1.gtf	NZ_CP047970.1	2865213	2866919	FX986_RS12030	unassigned_transcript_2394	alkaline phosphatase D family protein	WP_254696414.1	NA	0
#VALUE!	20.Cobetia_pacifica_GPM2_GCF_009931455.1.gtf	NZ_CP047970.1	270484	271305	FX986_RS01110	unassigned_transcript_222	alkaline phosphatase family protein	WP_084208519.1	NA	0
#VALUE!	21.Cobetia_sp_10Alg_146_GCF_029846385.1.gtf	NZ_JARWKT010000009.1	149626	151332	QD172_RS15175	unassigned_transcript_3425	alkaline phosphatase D family protein	WP_279856192.1	NA	0
#VALUE!	22.Cobetia_sp_3AK_GCF_029846335.1.gtf	NZ_JARWKR010000003.1	9187	10893	QD228_RS04890	unassigned_transcript_1649	alkaline phosphatase D family protein	WP_279874635.1	NA	0
#VALUE!	22.Cobetia_sp_3AK_GCF_029846335.1.gtf	NZ_JARWKR010000005.1	354584	355405	QD228_RS09705	unassigned_transcript_2627	alkaline phosphatase family protein	WP_084208519.1	NA	0
#VALUE!	23.Cobetia_pacifica_NRIC_0813T_GCF_030010515.1.gtf	NZ_JASCSB010000003.1	416281	417987	QLS87_RS07095	unassigned_transcript_1779	alkaline phosphatase D family protein	WP_240704267.1	NA	0
#VALUE!	23.Cobetia_pacifica_NRIC_0813T_GCF_030010515.1.gtf	NZ_JASCSB010000006.1	25950	26771	QLS87_RS10765	unassigned_transcript_2517	alkaline phosphatase family protein	WP_084208519.1	NA	0
#VALUE!	24.Cobetia_sp_MMG027_GCF_027947415.1.gtf	NZ_JAQJIO010000003.1	387751	389457	PJK54_RS05670	unassigned_transcript_1867	alkaline phosphatase D family protein	WP_271302424.1	NA	0
#VALUE!	24.Cobetia_sp_MMG027_GCF_027947415.1.gtf	NZ_JAQJIO010000004.1	31415	32236	PJK54_RS06010	unassigned_transcript_1946	alkaline phosphatase family protein	WP_084208519.1	NA	0
#VALUE!	25.Cobetia_sp_MM1IDA2H-1_GCF_002916775.1.gtf	NZ_MUEJ01000076.1	415935	417641	BOH68_RS15495	unassigned_transcript_3106	alkaline phosphatase D family protein	WP_258038356.1	NA	0
#VALUE!	26.Cobetia_marina_MM1IDA2H-1AD_GCF_900119965.1.gtf	NZ_FPLA01000092.1	415935	417641	BQ7275_RS15565	unassigned_transcript_3532	alkaline phosphatase D family protein	WP_258038356.1	NA	0
#VALUE!	27.Cobetia_sp_5-11-6-3_GCF_013374055.1.gtf	NZ_BLWJ01000002.1	419553	421259	HXS66_RS05660	unassigned_transcript_1132	alkaline phosphatase D family protein	WP_255303113.1	NA	0
#VALUE!	27.Cobetia_sp_5-11-6-3_GCF_013374055.1.gtf	NZ_BLWJ01000008.1	270244	271065	HXS66_RS14275	unassigned_transcript_2860	alkaline phosphatase family protein	WP_084208519.1	NA	0
#VALUE!	28.Cobetia_marinaT1_GCF_005144735.1.gtf	NZ_SWFN01000003.1	58384	60090	FBG13_RS10390	unassigned_transcript_2102	alkaline phosphatase D family protein	WP_240704267.1	NA	0
#VALUE!	29.Cobetia_marina_NBRC_15607_GCF_006540105.1.gtf	NZ_BJOH01000020.1	8158	9864	HHA02_RS09985	unassigned_transcript_2008	alkaline phosphatase D family protein	WP_240704267.1	NA	0
#VALUE!	29.Cobetia_marina_NBRC_15607_GCF_006540105.1.gtf	NZ_BJOH01000001.1	5782	6603	HHA02_RS00035	unassigned_transcript_7	alkaline phosphatase family protein	WP_136939347.1	NA	0
#VALUE!	3.Cobetia_sp_2AS1_GCF_014876835.1.gtf	NZ_JADAZN010000004.1	58689	60413	IIE25_RS09405	unassigned_transcript_2125	alkaline phosphatase D family protein	WP_225996507.1	NA	0
#VALUE!	30.Cobetia_sp_5-25-4-2_GCF_013374075.1.gtf	NZ_BLWK01000003.1	60138	61844	HXS65_RS07860	unassigned_transcript_1573	alkaline phosphatase D family protein	WP_255304452.1	NA	0
#VALUE!	31.Cobetia_sp_ICG0124_GCF_004006355.1.gtf	NZ_CP024893.1	2784300	2786123	CU110_RS13005	unassigned_transcript_2684	alkaline phosphatase D family protein	WP_240665388.1	NA	0
#VALUE!	32.Cobetia_marina_JCM_21022T_GCF_001720485.1.gtf	NZ_CP017114.1	3515079	3516785	BFX80_RS14820	unassigned_transcript_2915	alkaline phosphatase D family protein	WP_240499593.1	NA	0
#VALUE!	32.Cobetia_marina_JCM_21022T_GCF_001720485.1.gtf	NZ_CP017114.1	1883908	1884729	BFX80_RS07970	unassigned_transcript_1570	alkaline phosphatase family protein	WP_084208519.1	NA	0
#VALUE!	33.Cobetia_sp_L2A1_GCF_009796845.1.gtf	NZ_CP047025.1	604995	606674	GQR90_RS02645	unassigned_transcript_531	alkaline phosphatase D family protein	WP_233266401.1	NA	0
#VALUE!	34.Cobetia_sp_QF-1_GCF_002213105.1.gtf	NZ_NBVS01000003.1	58344	59918	CFN46_RS06760	unassigned_transcript_1844	alkaline phosphatase D family protein	WP_088743230.1	NA	0
#VALUE!	35.Cobetia_crustatorum_SM1923_GCF_007786215.1.gtf	NZ_VNFH01000002.1	58192	59766	FQP86_RS02870	unassigned_transcript_1330	alkaline phosphatase D family protein	WP_144726746.1	NA	0
#VALUE!	35.Cobetia_crustatorum_SM1923_GCF_007786215.1.gtf	NZ_VNFH01000004.1	38236	39075	FQP86_RS06370	unassigned_transcript_2054	alkaline phosphatase family protein	WP_088743763.1	NA	0
#VALUE!	36.Cobetia_crustatorum_JO1T_GCF_000591415.1.gtf	NZ_JEMF01000050.1	58448	59335	BF12_RS23145	unassigned_transcript_2306	alkaline phosphatase D family protein	WP_282705494.1	NA	0
#VALUE!	36.Cobetia_crustatorum_JO1T_GCF_000591415.1.gtf	NZ_JEMF01000050.1	59232	59969	BF12_RS23150	unassigned_transcript_2307	alkaline phosphatase D family protein	WP_282705495.1	NA	0
#VALUE!	4.Cobetia_sp_2AS_GCF_029846355.1.gtf	NZ_JARWKQ010000003.1	424447	426171	QD356_RS11625	unassigned_transcript_2422	alkaline phosphatase D family protein	WP_225996507.1	NA	0
#VALUE!	5.Cobetia_sp_1AS1_GCF_029846435.1.gtf	NZ_JARWKU010000007.1	58565	60262	QD280_RS12445	unassigned_transcript_3154	alkaline phosphatase D family protein	WP_279839461.1	NA	0
#VALUE!	6.Cobetia_litoralis_NRIC_0814T_GCF_029846315.1.gtf	NZ_JARWKV010000006.1	288718	290439	QD227_RS16255	unassigned_transcript_3454	alkaline phosphatase D family protein	WP_279834505.1	NA	0
#VALUE!	7.Cobetia_sp_MC34_GCF_018340035.1.gtf	NZ_JADPPY010000002.1	176010	177719	IZU87_RS02015	unassigned_transcript_1745	alkaline phosphatase D family protein	WP_249330383.1	NA	0
#VALUE!	8.Cobetia_sp_1CM21F_GCF_023161745.1.gtf	NZ_JALNTQ010000003.1	419566	421140	MSG32_RS13040	unassigned_transcript_2642	alkaline phosphatase D family protein	WP_248380112.1	NA	0
#VALUE!	9.Cobetia_sp_29-18-1_GCF_029846405.1.gtf	NZ_JARWKS010000001.1	395988	397562	QD208_RS01600	unassigned_transcript_1267	alkaline phosphatase D family protein	WP_279835410.1	NA	0
#VALUE!	4.Cobetia_sp_2AS_GCF_029846355.1.gtf	NZ_JARWKQ010000002.1	336996	337826	QD356_RS06565	unassigned_transcript_1404	alkaline phosphatase family protein	WP_192839216.1	NA	1
#VALUE!	36.Cobetia_crustatorum_JO1T_GCF_000591415.1.gtf	NZ_JEMF01000059.1	12629	13468	BF12_RS0112655	unassigned_transcript_2525	alkaline phosphatase family protein	WP_024952594.1	NA	1
#VALUE!	1.Cobetia_sp_UCD-24C_GCF_001306765.1.gtf	NZ_LJTD01000016.1	9770	10600	AOG28_RS16660	unassigned_transcript_1369	alkaline phosphatase family protein	WP_054557251.1	NA	1
#VALUE!	10.Cobetia_amphilecti_NRIC_0815T_GCA_030010415.1.gtf	NZ_JASCSA010000008.1	127776	128603	QLT01_RS11460	unassigned_transcript_3351	alkaline phosphatase family protein	WP_284726995.1	NA	1
#VALUE!	12.Cobetia_sp_AM6_GCF_009617955.1.gtf	NZ_AP021868.1	2349111	2349941	CLAM6_RS09995	unassigned_transcript_1994	alkaline phosphatase family protein	WP_153635957.1	NA	1
#VALUE!	13.Cobetia_amphilecti_N-80_GCF_020217465.1.gtf	NZ_CP084115.1	2334615	2335445	LCW13_RS09945	unassigned_transcript_1992	alkaline phosphatase family protein	WP_225346724.1	NA	1
#VALUE!	14.Cobetia_amphilecti_KMM_296_GCF_000754225.1.gtf	NZ_JQJA01000039.1	11728	12558	KP05_RS14230	unassigned_transcript_2886	alkaline phosphatase family protein	WP_043336117.1	NA	1
#VALUE!	15.Cobetia_sp_Dlab-2-U_GCF_024124585.1.gtf	NZ_JAMXRW010000008.1	177947	178777	NH343_RS13920	unassigned_transcript_3456	alkaline phosphatase family protein	WP_253064500.1	NA	1
#VALUE!	17.Cobetia_marina_402_GCF_013350055.1.gtf	NZ_JABVXD010000010.1	21681	22511	HUS67_RS11845	unassigned_transcript_29	alkaline phosphatase family protein	WP_175090103.1	NA	1
#VALUE!	18.Cobetia_sp_Cqz5-12_GCF_016495405.1.gtf	NZ_CP044522.1	2440529	2441359	F8A90_RS10215	unassigned_transcript_2043	alkaline phosphatase family protein	WP_200016943.1	NA	1
#VALUE!	2.Cobetia_amphilecti_B2M13_GCF_018860945.1.gtf	NZ_JAHKQM010000015.1	448033	448863	KO496_RS11045	unassigned_transcript_3365	alkaline phosphatase family protein	WP_216060785.1	NA	1
#VALUE!	21.Cobetia_sp_10Alg_146_GCF_029846385.1.gtf	NZ_JARWKT010000001.1	358950	359771	QD172_RS01470	unassigned_transcript_671	alkaline phosphatase family protein	WP_279854649.1	NA	1
#VALUE!	25.Cobetia_sp_MM1IDA2H-1_GCF_002916775.1.gtf	NZ_MUEJ01000025.1	32480	33301	BOH68_RS08700	unassigned_transcript_1751	alkaline phosphatase family protein	WP_077375791.1	NA	1
#VALUE!	26.Cobetia_marina_MM1IDA2H-1AD_GCF_900119965.1.gtf	NZ_FPLA01000029.1	32480	33301	BQ7275_RS08715	unassigned_transcript_743	alkaline phosphatase family protein	WP_077375791.1	NA	1
#VALUE!	28.Cobetia_marinaT1_GCF_005144735.1.gtf	NZ_SWFN01000004.1	299114	299935	FBG13_RS13325	unassigned_transcript_2694	alkaline phosphatase family protein	WP_136939347.1	NA	1
#VALUE!	3.Cobetia_sp_2AS1_GCF_014876835.1.gtf	NZ_JADAZN010000008.1	31523	32353	IIE25_RS15390	unassigned_transcript_3323	alkaline phosphatase family protein	WP_192839216.1	NA	1
#VALUE!	30.Cobetia_sp_5-25-4-2_GCF_013374075.1.gtf	NZ_BLWK01000006.1	26458	27279	HXS65_RS12855	unassigned_transcript_2573	alkaline phosphatase family protein	WP_176494061.1	NA	1
#VALUE!	31.Cobetia_sp_ICG0124_GCF_004006355.1.gtf	NZ_CP024893.1	1510236	1511057	CU110_RS06955	unassigned_transcript_1428	alkaline phosphatase family protein	WP_084208519.1	NA	1
#VALUE!	33.Cobetia_sp_L2A1_GCF_009796845.1.gtf	NZ_CP047025.1	1510956	1511795	GQR90_RS06555	unassigned_transcript_1312	alkaline phosphatase family protein	WP_024952594.1	NA	1
#VALUE!	34.Cobetia_sp_QF-1_GCF_002213105.1.gtf	NZ_NBVS01000007.1	116808	117647	CFN46_RS13390	unassigned_transcript_3162	alkaline phosphatase family protein	WP_088743763.1	NA	1
#VALUE!	5.Cobetia_sp_1AS1_GCF_029846435.1.gtf	NZ_JARWKU010000002.1	783095	783925	QD280_RS07085	unassigned_transcript_2069	alkaline phosphatase family protein	WP_279838774.1	NA	1
#VALUE!	6.Cobetia_litoralis_NRIC_0814T_GCF_029846315.1.gtf	NZ_JARWKV010000002.1	1099206	1100036	QD227_RS10195	unassigned_transcript_2223	alkaline phosphatase family protein	WP_279833222.1	NA	1
#VALUE!	7.Cobetia_sp_MC34_GCF_018340035.1.gtf	NZ_JADPPY010000016.1	19494	20324	IZU87_RS10330	unassigned_transcript_653	alkaline phosphatase family protein	WP_213114436.1	NA	1
#VALUE!	8.Cobetia_sp_1CM21F_GCF_023161745.1.gtf	NZ_JALNTQ010000001.1	956618	957448	MSG32_RS03910	unassigned_transcript_807	alkaline phosphatase family protein	WP_248377879.1	NA	1
#VALUE!	9.Cobetia_sp_29-18-1_GCF_029846405.1.gtf	NZ_JARWKS010000003.1	157950	158780	QD208_RS03695	unassigned_transcript_2323	alkaline phosphatase family protein	WP_279835708.1	NA	1
#VALUE!	1.Cobetia_sp_UCD-24C_GCF_001306765.1.gtf	NZ_LJTD01000004.1	204778	206016	AOG28_RS07315	unassigned_transcript_2153	alkaline phosphatase family protein	WP_054555885.1	NA	2
#VALUE!	10.Cobetia_amphilecti_NRIC_0815T_GCA_030010415.1.gtf	NZ_JASCSA010000023.1	7917	9185	QLT01_RS16935	unassigned_transcript_1305	alkaline phosphatase family protein	WP_284727576.1	NA	2
#VALUE!	11.Cobetia_sp_4B_GCF_018831605.1.gtf	NZ_CP059843.1	1690558	1691832	H2O77_RS07220	unassigned_transcript_1438	alkaline phosphatase family protein	WP_215824272.1	NA	2
#VALUE!	12.Cobetia_sp_AM6_GCF_009617955.1.gtf	NZ_AP021868.1	1603310	1604584	CLAM6_RS06865	unassigned_transcript_1367	alkaline phosphatase family protein	WP_153635520.1	NA	2
#VALUE!	13.Cobetia_amphilecti_N-80_GCF_020217465.1.gtf	NZ_CP084115.1	1677591	1678865	LCW13_RS07200	unassigned_transcript_1442	alkaline phosphatase family protein	WP_225347908.1	NA	2
#VALUE!	14.Cobetia_amphilecti_KMM_296_GCF_000754225.1.gtf	NZ_JQJA01000004.1	155865	157118	KP05_RS03715	unassigned_transcript_755	alkaline phosphatase family protein	WP_043332298.1	NA	2
#VALUE!	15.Cobetia_sp_Dlab-2-U_GCF_024124585.1.gtf	NZ_JAMXRW010000002.1	394713	395981	NH343_RS04760	unassigned_transcript_1524	alkaline phosphatase family protein	WP_253061861.1	NA	2
#VALUE!	16.Cobetia_sp_Dlab-2-AX_GCF_024124625.1.gtf	NZ_JAMXRV010000002.1	203312	204580	NH396_RS03975	unassigned_transcript_1287	alkaline phosphatase family protein	WP_253061861.1	NA	2
#VALUE!	17.Cobetia_marina_402_GCF_013350055.1.gtf	NZ_JABVXD010000016.1	51524	52798	HUS67_RS15065	unassigned_transcript_704	alkaline phosphatase family protein	WP_175090544.1	NA	2
#VALUE!	18.Cobetia_sp_Cqz5-12_GCF_016495405.1.gtf	NZ_CP044522.1	1647416	1648684	F8A90_RS07045	unassigned_transcript_1409	alkaline phosphatase family protein	WP_200019524.1	NA	2
#VALUE!	2.Cobetia_amphilecti_B2M13_GCF_018860945.1.gtf	NZ_JAHKQM010000018.1	5393	6616	KO496_RS11825	unassigned_transcript_1859	alkaline phosphatase family protein	WP_216060931.1	NA	2
#VALUE!	3.Cobetia_sp_2AS1_GCF_014876835.1.gtf	NZ_JADAZN010000002.1	393974	395248	IIE25_RS05480	unassigned_transcript_1323	alkaline phosphatase family protein	WP_192838056.1	NA	2
#VALUE!	33.Cobetia_sp_L2A1_GCF_009796845.1.gtf	NZ_CP047025.1	2336810	2338033	GQR90_RS10040	unassigned_transcript_2008	alkaline phosphatase family protein	WP_158773983.1	NA	2
#VALUE!	4.Cobetia_sp_2AS_GCF_029846355.1.gtf	NZ_JARWKQ010000001.1	936437	937711	QD356_RS03970	unassigned_transcript_875	alkaline phosphatase family protein	WP_192838056.1	NA	2
#VALUE!	5.Cobetia_sp_1AS1_GCF_029846435.1.gtf	NZ_JARWKU010000001.1	634165	635439	QD280_RS02695	unassigned_transcript_1178	alkaline phosphatase family protein	WP_279838219.1	NA	2
#VALUE!	6.Cobetia_litoralis_NRIC_0814T_GCF_029846315.1.gtf	NZ_JARWKV010000001.1	354241	355509	QD227_RS01490	unassigned_transcript_473	alkaline phosphatase family protein	WP_279830791.1	NA	2
#VALUE!	6.Cobetia_litoralis_NRIC_0814T_GCF_029846315.1.gtf	NZ_JARWKV010000004.1	31997	33265	QD227_RS12065	unassigned_transcript_2613	alkaline phosphatase family protein	WP_279830791.1	NA	2
#VALUE!	8.Cobetia_sp_1CM21F_GCF_023161745.1.gtf	NZ_JALNTQ010000002.1	386703	387977	MSG32_RS07305	unassigned_transcript_1491	alkaline phosphatase family protein	WP_248378997.1	NA	2
#VALUE!	9.Cobetia_sp_29-18-1_GCF_029846405.1.gtf	NZ_JARWKS010000010.1	25603	26841	QD208_RS09650	unassigned_transcript_24	alkaline phosphatase family protein	WP_279836670.1	NA	2
#VALUE!	33.Cobetia_sp_L2A1_GCF_009796845.1.gtf	NZ_CP047025.1	2557100	2558890	GQR90_RS10950	unassigned_transcript_2190	alkaline phosphatase family protein	WP_158774142.1	NA	3
#VALUE!	34.Cobetia_sp_QF-1_GCF_002213105.1.gtf	NZ_NBVS01000009.1	34436	36214	CFN46_RS14550	unassigned_transcript_3398	alkaline phosphatase family protein	WP_088743908.1	NA	3
#VALUE!	35.Cobetia_crustatorum_SM1923_GCF_007786215.1.gtf	NZ_VNFH01000004.1	230456	232234	FQP86_RS07180	unassigned_transcript_2216	alkaline phosphatase family protein	WP_144727163.1	NA	3
1	1.Cobetia_sp_UCD-24C_GCF_001306765.1.gtf	NZ_LJTD01000005.1	206524	208140	AOG28_RS09595	unassigned_transcript_2640	alkaline phosphatase	WP_235507008.1	NA	4
2	10.Cobetia_amphilecti_NRIC_0815T_GCA_030010415.1.gtf	NZ_JASCSA010000006.1	103893	105509	QLT01_RS09270	unassigned_transcript_2895	alkaline phosphatase	WP_284726808.1	NA	4
3	12.Cobetia_sp_AM6_GCF_009617955.1.gtf	NZ_AP021868.1	2831012	2832628	CLAM6_RS11880	unassigned_transcript_2375	alkaline phosphatase	WP_242007665.1	NA	4
4	14.Cobetia_amphilecti_KMM_296_GCF_000754225.1.gtf	NZ_JQJA01000018.1	30041	31657	KP05_RS09405	unassigned_transcript_1917	alkaline phosphatase	WP_245163010.1	NA	4
5	2.Cobetia_amphilecti_B2M13_GCF_018860945.1.gtf	NZ_JAHKQM010000010.1	212005	213621	KO496_RS07905	unassigned_transcript_534	alkaline phosphatase	WP_234368129.1	NA	4
6	34.Cobetia_sp_QF-1_GCF_002213105.1.gtf	NZ_NBVS01000002.1	669885	671504	CFN46_RS06210	unassigned_transcript_1729	alkaline phosphatase	WP_246116512.1	NA	4
7	35.Cobetia_crustatorum_SM1923_GCF_007786215.1.gtf	NZ_VNFH01000005.1	269948	271567	FQP86_RS08855	unassigned_transcript_2561	alkaline phosphatase	WP_246116512.1	NA	4
8	36.Cobetia_crustatorum_JO1T_GCF_000591415.1.gtf	NZ_JEMF01000030.1	9723	11087	BF12_RS19235	unassigned_transcript_1586	alkaline phosphatase	WP_248623642.1	NA	4
9	5.Cobetia_sp_1AS1_GCF_029846435.1.gtf	NZ_JARWKU010000002.1	379738	381354	QD280_RS05435	unassigned_transcript_1739	alkaline phosphatase	WP_279838543.1	NA	4
10	8.Cobetia_sp_1CM21F_GCF_023161745.1.gtf	NZ_JALNTQ010000001.1	537001	538617	MSG32_RS02250	unassigned_transcript_472	alkaline phosphatase	WP_248377282.1	NA	4
11	1.Cobetia_sp_UCD-24C_GCF_001306765.1.gtf	NZ_LJTD01000003.1	510309	512471	AOG28_RS06335	unassigned_transcript_1933	alkaline phosphatase D family protein	WP_054555671.1	NA	5
12	10.Cobetia_amphilecti_NRIC_0815T_GCA_030010415.1.gtf	NZ_JASCSA010000011.1	57682	59808	QLT01_RS13510	unassigned_transcript_172	alkaline phosphatase D family protein	WP_284727213.1	NA	5
13	11.Cobetia_sp_4B_GCF_018831605.1.gtf	NZ_CP059843.1	3534505	3536667	H2O77_RS14565	unassigned_transcript_2909	alkaline phosphatase D family protein	WP_215823407.1	NA	5
14	12.Cobetia_sp_AM6_GCF_009617955.1.gtf	NZ_AP021868.1	3450804	3452966	CLAM6_RS14500	unassigned_transcript_2898	alkaline phosphatase D family protein	WP_153636482.1	NA	5
15	13.Cobetia_amphilecti_N-80_GCF_020217465.1.gtf	NZ_CP084115.1	3368238	3370397	LCW13_RS14145	unassigned_transcript_2830	alkaline phosphatase family protein	WP_225347230.1	NA	5
16	14.Cobetia_amphilecti_KMM_296_GCF_000754225.1.gtf	NZ_JQJA01000022.1	4093	6267	KP05_RS10430	unassigned_transcript_2123	alkaline phosphatase D family protein	WP_052384691.1	NA	5
17	15.Cobetia_sp_Dlab-2-U_GCF_024124585.1.gtf	NZ_JAMXRW010000013.1	32510	34648	NH343_RS16155	unassigned_transcript_381	alkaline phosphatase family protein	WP_253064933.1	NA	5
18	16.Cobetia_sp_Dlab-2-AX_GCF_024124625.1.gtf	NZ_JAMXRV010000013.1	57865	60003	NH396_RS16230	unassigned_transcript_342	alkaline phosphatase family protein	WP_253064933.1	NA	5
19	17.Cobetia_marina_402_GCF_013350055.1.gtf	NZ_JABVXD010000005.1	235833	238049	HUS67_RS07595	unassigned_transcript_2579	alkaline phosphatase family protein	WP_175089240.1	NA	5
20	18.Cobetia_sp_Cqz5-12_GCF_016495405.1.gtf	NZ_CP044522.1	3431771	3433906	F8A90_RS14300	unassigned_transcript_2862	alkaline phosphatase D family protein	WP_200017549.1	NA	5
21	19.Cobetia_sp_MB87_GCF_011319755.1.gtf	NZ_VFBC01000010.1	58815	60950	CDPAHKCJ_RS11965	unassigned_transcript_631	alkaline phosphatase D family protein	WP_166020003.1	NA	5
22	2.Cobetia_amphilecti_B2M13_GCF_018860945.1.gtf	NZ_JAHKQM010000024.1	57909	60071	KO496_RS14570	unassigned_transcript_960	alkaline phosphatase D family protein	WP_216061230.1	NA	5
23	20.Cobetia_pacifica_GPM2_GCF_009931455.1.gtf	NZ_CP047970.1	1471838	1473862	FX986_RS06075	unassigned_transcript_1214	alkaline phosphatase family protein	WP_254696557.1	NA	5
24	21.Cobetia_sp_10Alg_146_GCF_029846385.1.gtf	NZ_JARWKT010000010.1	59756	61780	QD172_RS15615	unassigned_transcript_46	alkaline phosphatase family protein	WP_279856235.1	NA	5
25	22.Cobetia_sp_3AK_GCF_029846335.1.gtf	NZ_JARWKR010000002.1	57233	59257	QD228_RS02825	unassigned_transcript_1225	alkaline phosphatase family protein	WP_240499655.1	NA	5
26	23.Cobetia_pacifica_NRIC_0813T_GCF_030010515.1.gtf	NZ_JASCSB010000002.1	559216	561240	QLS87_RS05135	unassigned_transcript_1380	alkaline phosphatase family protein	WP_284728477.1	NA	5
27	24.Cobetia_sp_MMG027_GCF_027947415.1.gtf	NZ_JAQJIO010000009.1	170311	172335	PJK54_RS13835	unassigned_transcript_3520	alkaline phosphatase family protein	WP_240499655.1	NA	5
28	25.Cobetia_sp_MM1IDA2H-1_GCF_002916775.1.gtf	NZ_MUEJ01000066.1	58162	60186	BOH68_RS13465	unassigned_transcript_2704	alkaline phosphatase family protein	WP_255303155.1	NA	5
29	26.Cobetia_marina_MM1IDA2H-1AD_GCF_900119965.1.gtf	NZ_FPLA01000081.1	58162	60186	BQ7275_RS13535	unassigned_transcript_368	alkaline phosphatase family protein	WP_255303155.1	NA	5
30	27.Cobetia_sp_5-11-6-3_GCF_013374055.1.gtf	NZ_BLWJ01000003.1	493394	495418	HXS66_RS07890	unassigned_transcript_1578	alkaline phosphatase family protein	WP_255303155.1	NA	5
31	28.Cobetia_marinaT1_GCF_005144735.1.gtf	NZ_SWFN01000002.1	857562	859586	FBG13_RS09960	unassigned_transcript_2016	alkaline phosphatase family protein	WP_240704252.1	NA	5
32	29.Cobetia_marina_NBRC_15607_GCF_006540105.1.gtf	NZ_BJOH01000079.1	6635	8659	HHA02_RS17365	unassigned_transcript_3492	alkaline phosphatase family protein	WP_255317702.1	NA	5
33	3.Cobetia_sp_2AS1_GCF_014876835.1.gtf	NZ_JADAZN010000001.1	59952	62132	IIE25_RS00225	unassigned_transcript_258	alkaline phosphatase family protein	WP_192837404.1	NA	5
34	30.Cobetia_sp_5-25-4-2_GCF_013374075.1.gtf	NZ_BLWK01000002.1	616244	618268	HXS65_RS07430	unassigned_transcript_1487	alkaline phosphatase family protein	WP_255304446.1	NA	5
35	31.Cobetia_sp_ICG0124_GCF_004006355.1.gtf	NZ_CP024893.1	653296	655062	CU110_RS02995	unassigned_transcript_619	alkaline phosphatase family protein	WP_127734507.1	NA	5
36	32.Cobetia_marina_JCM_21022T_GCF_001720485.1.gtf	NZ_CP017114.1	734597	736621	BFX80_RS03210	unassigned_transcript_610	alkaline phosphatase family protein	WP_240499655.1	NA	5
37	33.Cobetia_sp_L2A1_GCF_009796845.1.gtf	NZ_CP047025.1	3354710	3356905	GQR90_RS14310	unassigned_transcript_2865	alkaline phosphatase family protein	WP_158774696.1	NA	5
38	35.Cobetia_crustatorum_SM1923_GCF_007786215.1.gtf	NZ_VNFH01000012.1	69367	71508	FQP86_RS15725	unassigned_transcript_906	alkaline phosphatase family protein	WP_144728015.1	NA	5
39	4.Cobetia_sp_2AS_GCF_029846355.1.gtf	NZ_JARWKQ010000004.1	317572	319752	QD356_RS13100	unassigned_transcript_2717	alkaline phosphatase family protein	WP_192837404.1	NA	5
40	5.Cobetia_sp_1AS1_GCF_029846435.1.gtf	NZ_JARWKU010000008.1	145073	147229	QD280_RS13525	unassigned_transcript_3370	alkaline phosphatase D family protein	WP_279839645.1	NA	5
41	6.Cobetia_litoralis_NRIC_0814T_GCF_029846315.1.gtf	NZ_JARWKV010000002.1	57556	59718	QD227_RS05850	unassigned_transcript_1354	alkaline phosphatase D family protein	WP_279832006.1	NA	5
42	7.Cobetia_sp_MC34_GCF_018340035.1.gtf	NZ_JADPPY010000022.1	21670	23832	IZU87_RS12105	unassigned_transcript_1288	alkaline phosphatase D family protein	WP_213114659.1	NA	5
43	8.Cobetia_sp_1CM21F_GCF_023161745.1.gtf	NZ_JALNTQ010000007.1	65869	68031	MSG32_RS16755	unassigned_transcript_3385	alkaline phosphatase family protein	WP_248380900.1	NA	5
44	9.Cobetia_sp_29-18-1_GCF_029846405.1.gtf	NZ_JARWKS010000012.1	65874	68036	QD208_RS10905	unassigned_transcript_275	alkaline phosphatase D family protein	WP_279836807.1	NA	5
